# Supplementary material
Source: publisher site journal article supplement (https://www.dovepress.com/article/599999)
Supplement: Supplementary file 1 [file 599999%20Supplementary%20Table%201.docx]

**Supplementary**

**Table S1 Different weights assigned for specific conditions in the Age-Adjusted Charlson Comorbidity Index**

| Index Score | Condition |
| --- | --- |
| 1 | Myocardial infarction |
|  | Congestive heart failure  Peripheral vascular disease  Cerebral vascular disease  Dementia  Chronic pulmonary disease  Connective tissue disease  Ulcer disease  Mild liver disease |
|  | Diabetes without end organ damage |
| 2  3  6 | Hemiplegia  Moderate/severe renal disease  Diabetes with end-organ damage  Solid tumor  Leukemia  Lymphoma  Moderate/severe liver disease  Metastatic solid tumor  Acquired immunodeficiency syndrome |

Note: Add 1 point per decade to age＞40 years(up to 4 points)
